# Supplementary figures and images for: How Does ASR Technology Enhance English LearningOutcomes? Examining the Roles of Learner's Origin, Device Type, and Learning Styles
Source: Research Square preprint supplement (doi:10.21203/rs.3.rs-6404344/v1), 2025-07-29

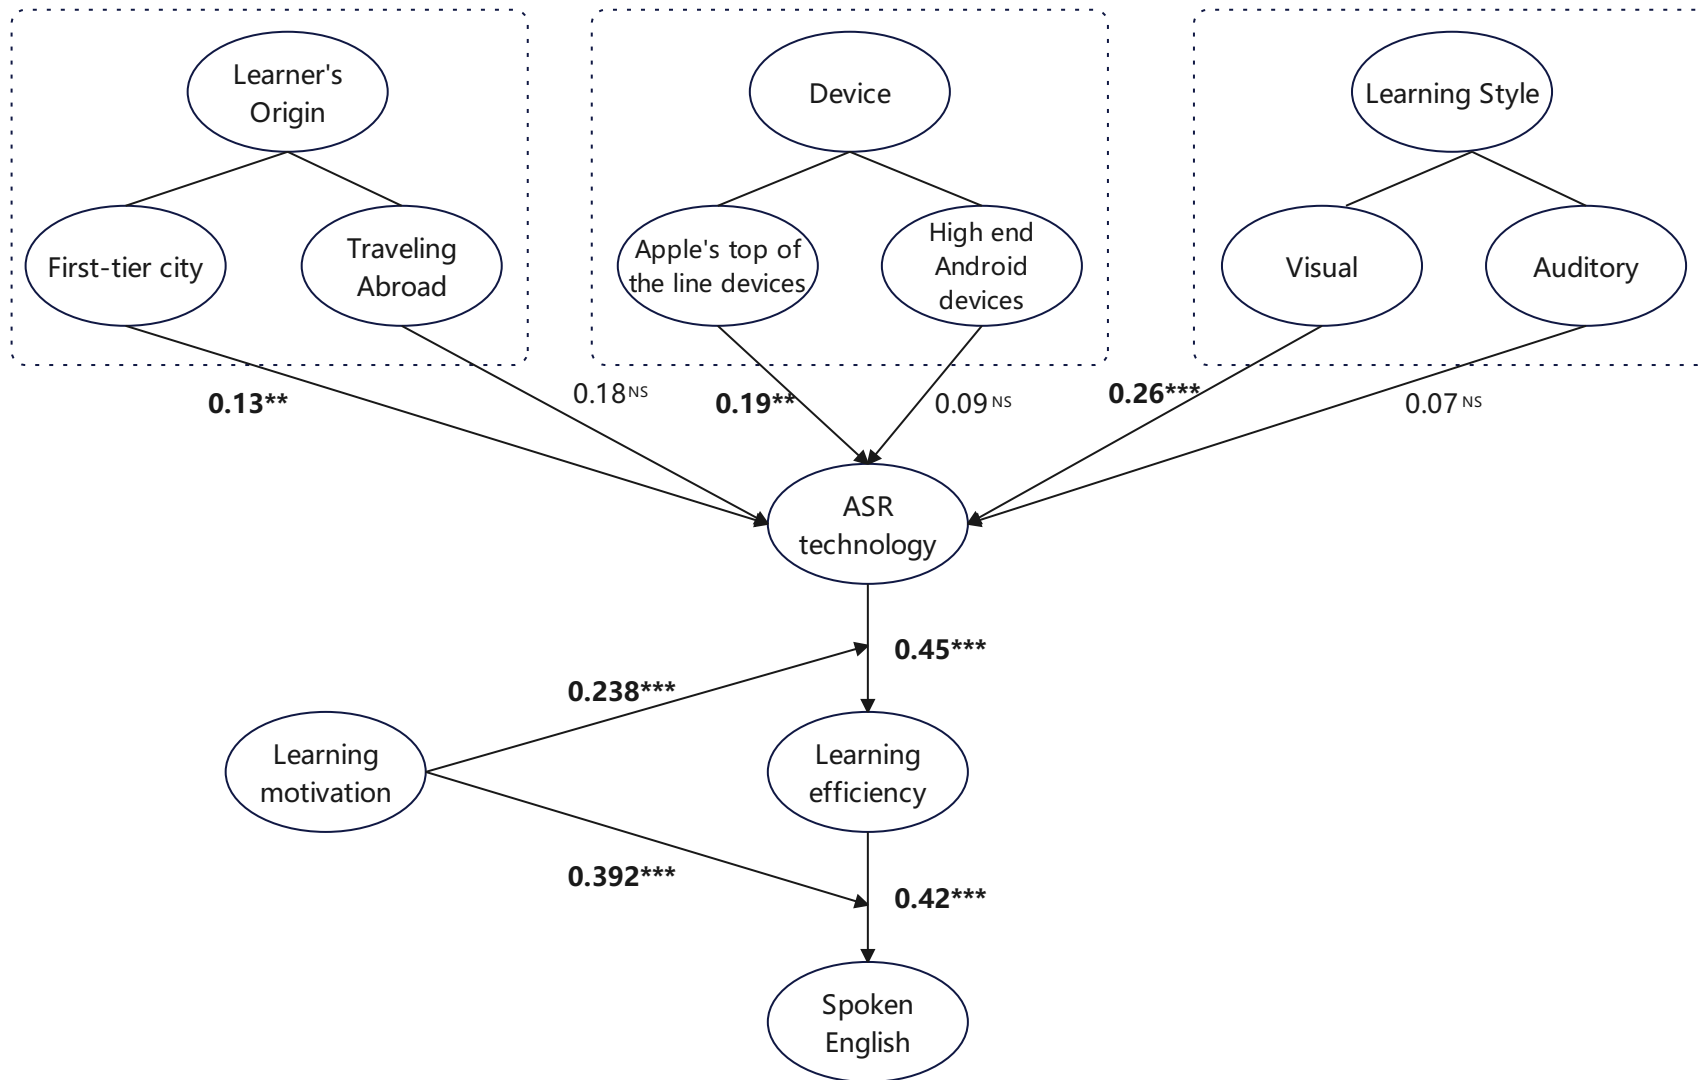

Supplement: Supplementary file 1 [file LJXS.pdf › plos_latex_ASR (wmx投稿) (2)/LJXS.pdf]

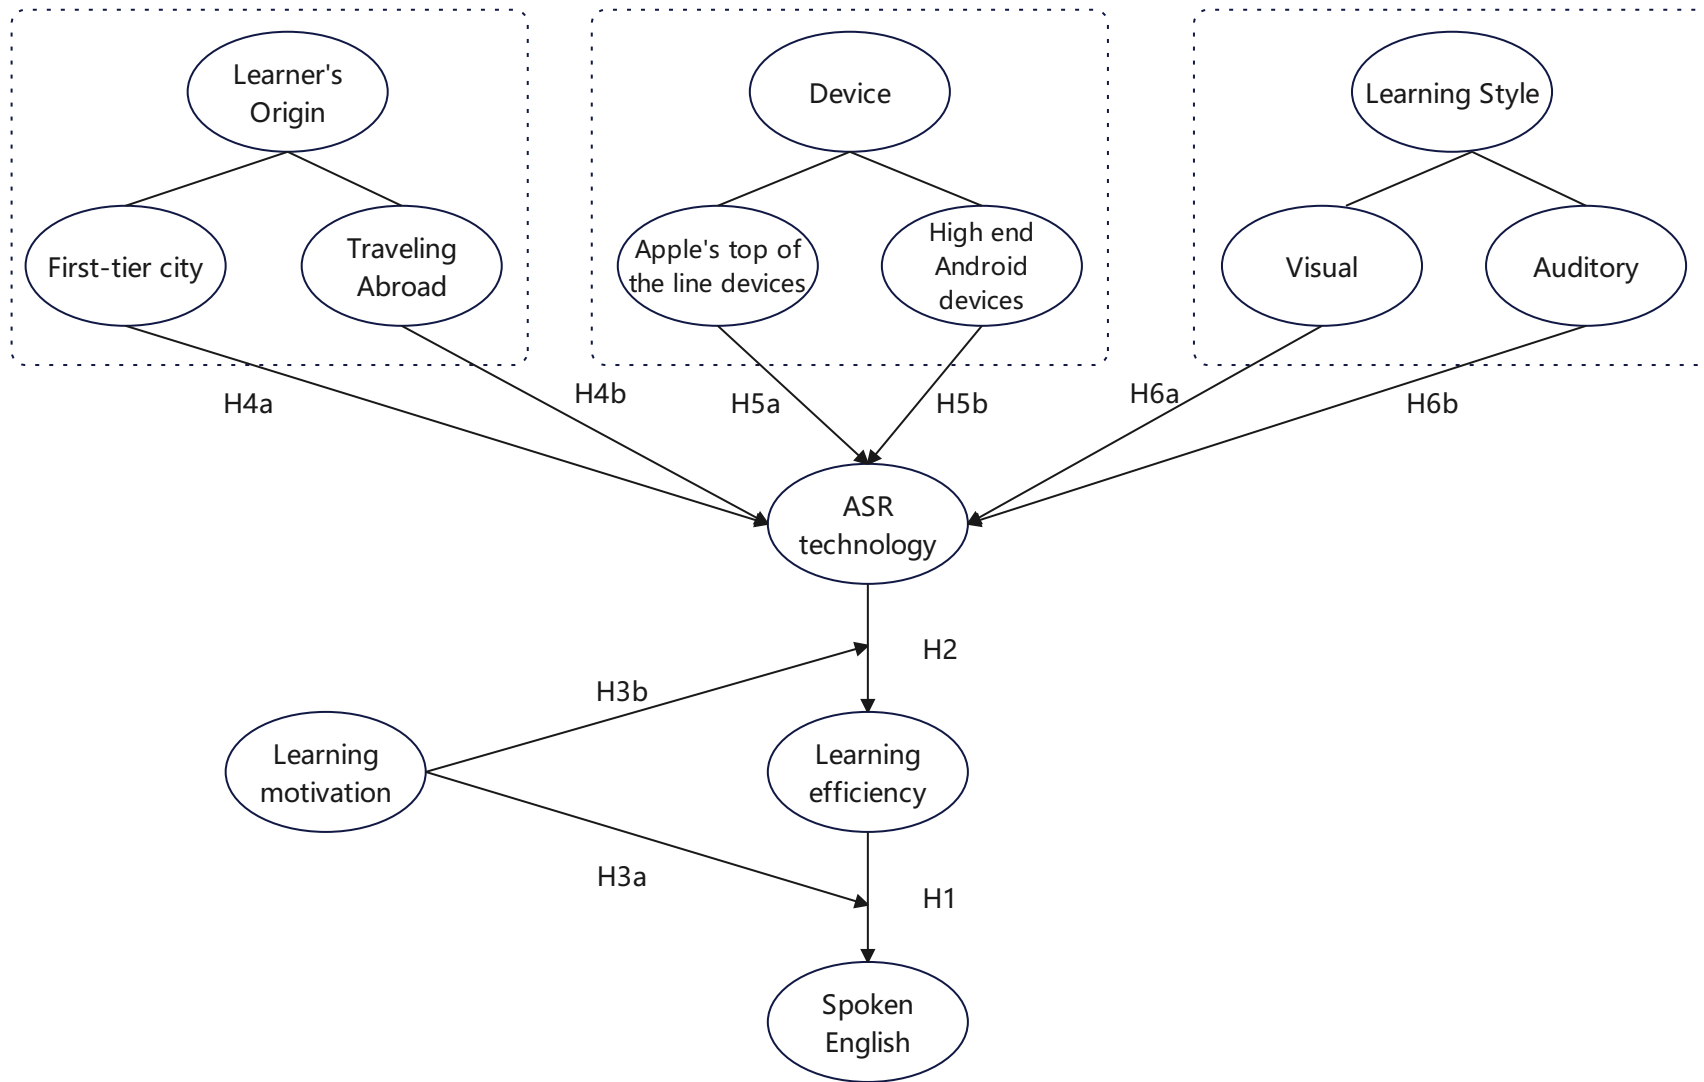

Supplement: Supplementary file 2 [file LS.pdf › plos_latex_ASR (wmx投稿) (2)/LS.pdf]
